# Supplementary material for: Activity of PD1 inhibitor therapy in advanced sarcoma: a single-center retrospective analysis
Source: Springer Nature journal article supplement (doi:10.1186/s12885-020-07021-x), 2020-06-05

# Additional File 1.

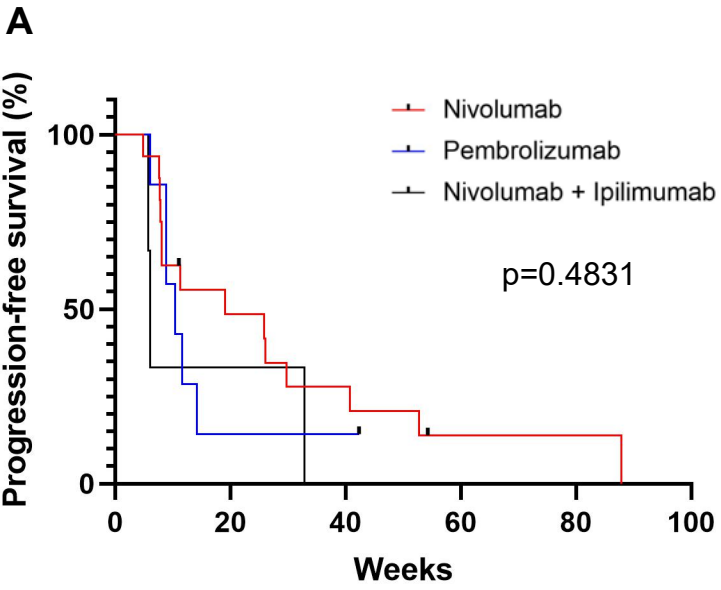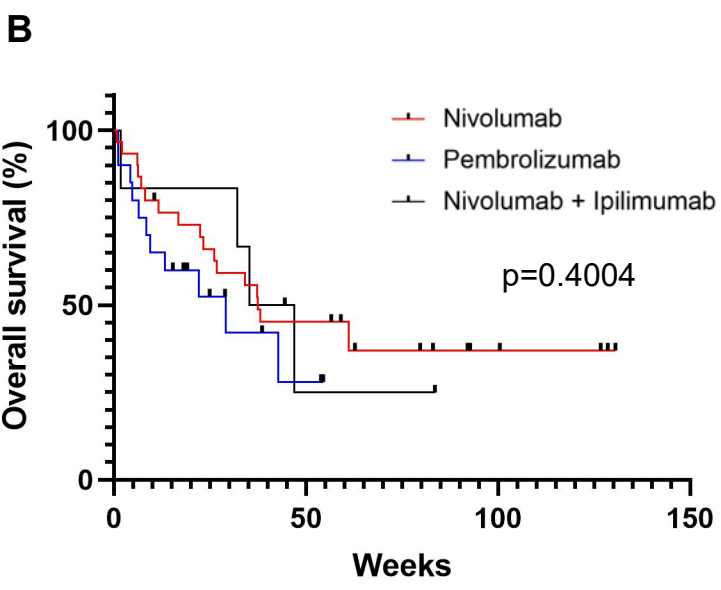

Supplement: MOESM1 [file 18054294]
